# Supplementary material for: A novel two-dimensional cobaltporphyrin-based organic framework as a promising electrocatalyst for CO2 reduction reaction: a computational study
Source: Royal Society of Chemistry journal article supplement (doi:10.1039/d3nj05424a), 2024-01-01
Supplement: d3nj05424a1.pdf [file d3nj05424a1.pdf]

## Supporting Information

**A novel two-dimensional cobaltporphyrin-based organic framework as a promising electrocatalyst for CO<sub>2</sub> reduction reaction: a computational study**

*Kai Gong,<sup>a</sup> Xue-Wei Wen,<sup>a</sup> Xuan-Feng He,<sup>a</sup> Yu-Huai Fei,<sup>a</sup> Jing Song<sup>a\*</sup> and Cong Wang<sup>a\*</sup>*

*<sup>a</sup> School of Materials Science and Engineering, Changchun University of Science and Technology, Engineering Research Center of Optoelectronic Functional Materials, Ministry of Education, Changchun 130022, China.*

*\*Emails: [songjing@cust.edu.cn](mailto:songjing@cust.edu.cn); [wangc813@cust.edu.cn](mailto:wangc813@cust.edu.cn)*

## Computational details

The adsorption energy ( $E_{\text{ads}}$ ) for \*CO intermediate on the 2D TM-PMOF was defined as  $E_{\text{ads}} = E_{\text{TM-PMOF-CO}} - E_{\text{TM-PMOF}} - E_{\text{CO}}$ , where  $E_{\text{TM-PMOF-CO}}$ ,  $E_{\text{TM-PMOF}}$ , and  $E_{\text{CO}}$  are the total energy for the \*CO adsorbed on the 2D TM-PMOF, the pure 2D TM-PMOF, and the CO molecule, respectively. A negative value of the  $E_{\text{ads}}$  suggests favorable adsorption. The change in Gibbs free energy ( $\Delta G$ ) of every elemental step was acquired by applying the computational hydrogen electrode (CHE) model proposed by Nørskov et al.<sup>1,2</sup> In detail, the Gibbs free energy change is defined as  $\Delta G = \Delta E + \Delta E_{\text{ZPE}} - T\Delta S + \Delta G_{\text{pH}} + \Delta G_{\text{U}}$ , where  $\Delta E$  is the electronic energy difference directly obtained by DFT calculations,  $\Delta E_{\text{ZPE}}$  is the zero-point energy change,  $T$  is set at room temperature (298.15 K), and  $\Delta S$  is the entropy change. The zero-point energies and entropies of adsorbed species were calculated from the vibrational frequencies, in which only the vibrational modes of adsorbate were calculated explicitly, while the catalyst substrate was fixed.<sup>3-5</sup> The entropies and vibrational frequencies of the free molecules were taken from the NIST database.<sup>6</sup> At the same time, the calculated energies, ZPE, and TS of these free molecules are listed in Table S1.  $\Delta G_{\text{pH}}$  is the free energy correction of pH, calculated by  $\Delta G_{\text{pH}} = 2.303k_{\text{B}}T\text{pH}$  ( $k_{\text{B}}$  is the Boltzmann constant, and the pH value was set to zero for all the calculations here).  $\Delta G_{\text{U}}$  is the free energy contribution related to electrode potential (U), which can be determined as  $\Delta G_{\text{U}} = -neU$ , where  $n$  is the number of electrons transferred and  $U$  is the applied electrode potential.

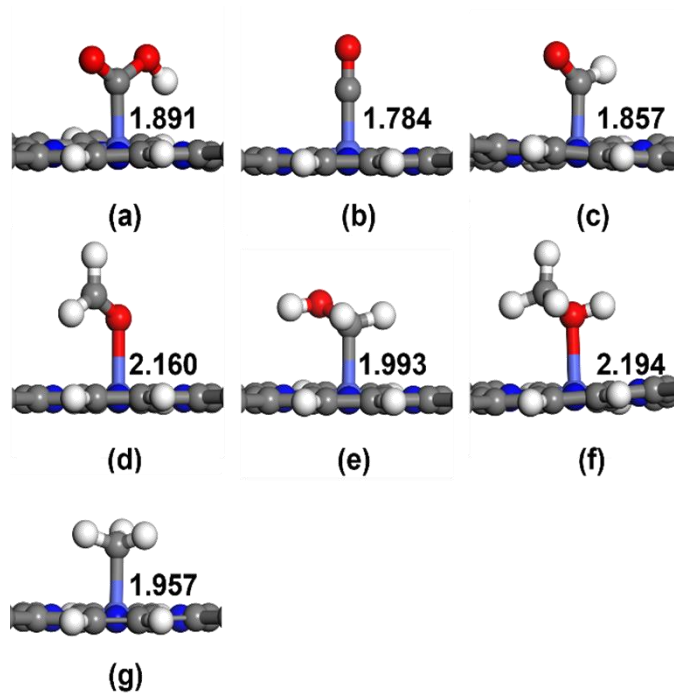

**Figure S1.** The optimized structures of intermediates corresponding to the optimal CO<sub>2</sub>RR on the 2D Co-PMOF: (a) \*COOH, (b) \*CO, (c) \*CHO, (d) \*OCH<sub>2</sub>, (e) \*CH<sub>2</sub>OH, (f) \*OHCH<sub>3</sub>, (g) \*CH<sub>3</sub>.

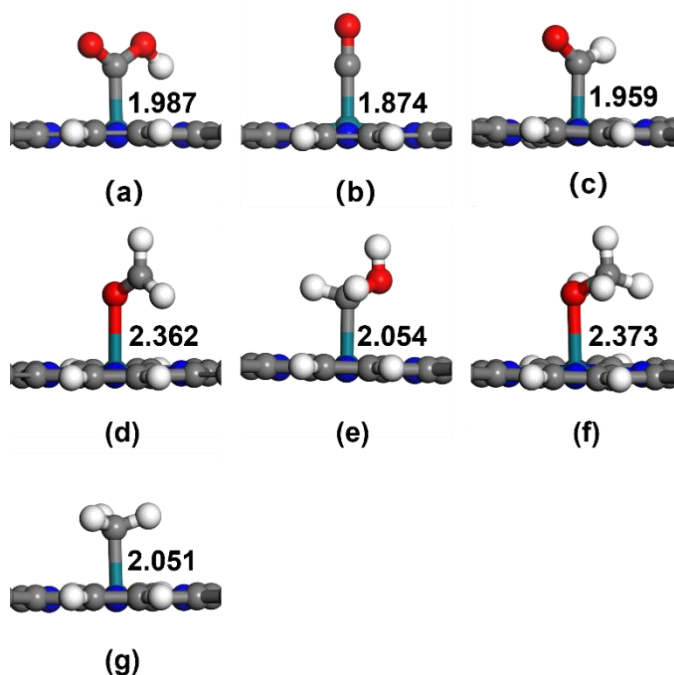

**Figure S2.** The optimized structures of intermediates corresponding to the optimal CO<sub>2</sub>RR on the 2D Rh-PMOF: (a) \*COOH, (b) \*CO, (c) \*CHO, (d) \*OCH<sub>2</sub>, (e) \*CH<sub>2</sub>OH, (f) \*OHCH<sub>3</sub>, (g) \*CH<sub>3</sub>.

**Table S1.** Change in Gibbs free energies ( $\Delta G$ , eV) for all possible elementary steps for CO<sub>2</sub>RR on Co-PMOF. The computed results corresponding to the optimal reduction path are marked in yellow.

| Reaction pathway                                                                            | $\Delta G$ /(eV) |
|---------------------------------------------------------------------------------------------|------------------|
| * + CO <sub>2</sub> + H <sup>+</sup> + e <sup>-</sup> → *COOH                               | 0.07             |
| * + CO <sub>2</sub> + H <sup>+</sup> + e <sup>-</sup> → *OCHO                               | 0.73             |
| *COOH + H <sup>+</sup> + e <sup>-</sup> → *CO + H <sub>2</sub> O                            | 0.53             |
| *CO + H <sup>+</sup> + e <sup>-</sup> → *CHO                                                | -0.13            |
| *CO + H <sup>+</sup> + e <sup>-</sup> → *COH                                                | 1.59             |
| *CHO + H <sup>+</sup> + e <sup>-</sup> → *OCH <sub>2</sub>                                  | 0.25             |
| *CHO + H <sup>+</sup> + e <sup>-</sup> → *CHOH                                              | 0.80             |
| *CH <sub>2</sub> O + H <sup>+</sup> + e <sup>-</sup> → *CH <sub>2</sub> OH                  | -0.39            |
| *CH <sub>2</sub> O + H <sup>+</sup> + e <sup>-</sup> → *OCH <sub>3</sub>                    | 0.35             |
| *CH <sub>2</sub> OH + H <sup>+</sup> + e <sup>-</sup> → *OHCH <sub>3</sub>                  | -0.18            |
| *CH <sub>2</sub> OH + H <sup>+</sup> + e <sup>-</sup> → *CH <sub>2</sub> + H <sub>2</sub> O | 1.32             |
| *OHCH <sub>3</sub> + H <sup>+</sup> + e <sup>-</sup> → *CH <sub>3</sub> + H <sub>2</sub> O  | -0.34            |
| *CH <sub>3</sub> + H <sup>+</sup> + e <sup>-</sup> → * + CH <sub>4</sub>                    | -0.51            |

**Table S2.** Change in Gibbs free energies ( $\Delta G$ , eV) for all possible elementary steps for CO<sub>2</sub>RR on Rh-PMOF. The computed results corresponding to the optimal reduction path are marked in yellow.

| Reaction pathway                                                                            | $\Delta G$ /(eV) |
|---------------------------------------------------------------------------------------------|------------------|
| * + CO <sub>2</sub> + H <sup>+</sup> + e <sup>-</sup> → *COOH                               | -0.03            |
| * + CO <sub>2</sub> + H <sup>+</sup> + e <sup>-</sup> → *OCHO                               | 0.89             |
| *COOH + H <sup>+</sup> + e <sup>-</sup> → *CO + H <sub>2</sub> O                            | 0.63             |
| *CO + H <sup>+</sup> + e <sup>-</sup> → *CHO                                                | -0.63            |
| *CO + H <sup>+</sup> + e <sup>-</sup> → *COH                                                | 1.43             |
| *CHO + H <sup>+</sup> + e <sup>-</sup> → *OCH <sub>2</sub>                                  | 0.98             |
| *CHO + H <sup>+</sup> + e <sup>-</sup> → *CHOH                                              | 1.00             |
| *CH <sub>2</sub> O + H <sup>+</sup> + e <sup>-</sup> → *CH <sub>2</sub> OH                  | -0.51            |
| *CH <sub>2</sub> O + H <sup>+</sup> + e <sup>-</sup> → *OCH <sub>3</sub>                    | 1.146            |
| *CH <sub>2</sub> OH + H <sup>+</sup> + e <sup>-</sup> → *OHCH <sub>3</sub>                  | -0.15            |
| *CH <sub>2</sub> OH + H <sup>+</sup> + e <sup>-</sup> → *CH <sub>2</sub> + H <sub>2</sub> O | 1.01             |
| *OHCH <sub>3</sub> + H <sup>+</sup> + e <sup>-</sup> → *CH <sub>3</sub> + H <sub>2</sub> O  | -0.56            |
| *CH <sub>3</sub> + H <sup>+</sup> + e <sup>-</sup> → * + CH <sub>4</sub>                    | -0.29            |

**Table S3.** The charge states analyzed by Hirshfeld charge of the three moieties for 2D Co-PMOF along the optimal reaction pathway. The moieties 1, 2, and 3 represent the Co-PMOF substrate, the CoN<sub>4</sub> unit, and the adsorbed \*C<sub>x</sub>O<sub>y</sub>H<sub>z</sub>, respectively. 1, 2, 3, 4, 5, 6, 7, and 8 illustrate the CO<sub>2</sub>, \*COOH, \*CO, \*CHO, \*CH<sub>2</sub>O, \*CH<sub>2</sub>OH, \*OHCH<sub>3</sub>, and \*CH<sub>3</sub> intermediates along the reaction pathway.

| <b>Reaction step</b> | <b>Moiety 1</b> | <b>Moiety 2</b> | <b>Moiety 3</b> |
|----------------------|-----------------|-----------------|-----------------|
| 1                    | 0.2887          | -0.2857         | 0.0030          |
| 2                    | 0.3786          | -0.2386         | -0.1389         |
| 3                    | 0.2004          | -0.2282         | 0.0331          |
| 4                    | 0.2837          | -0.2304         | -0.0504         |
| 5                    | 0.0703          | -0.2384         | 0.1718          |
| 6                    | 0.1523          | -0.2275         | 0.079           |
| 7                    | 0.0533          | -0.2144         | 0.1647          |
| 8                    | 0.2175          | -0.1826         | -0.0306         |

### Supplementary References

- 1 J. K. Nørskov, J. Rossmeisl, A. Logadottir, L. Lindqvist, J. R. Kitchin, T. Bligaard and H. Jónsson, *J. Phys. Chem. B*, 2004, **46**, 17886-17892.
- 2 J. Rossmeisl, A. Logadottir and J. K. Nørskov, *Chem. Phys.*, 2005, **319**, 178-184.
- 3 J. Zhao, J. X. Zhao, F. Y. Li and Z. F. Chen, *J. Phys. Chem. C*, 2018, **122**, 19712-19721.
- 4 J. H. Liu, L. M. Yang and E. Ganz, *J. Mater. Chem. A*, 2019, **7**, 3805-3814.
- 5 J. H. Liu, L. M. Yang and E. Ganz, *ACS Sustainable Chem. Eng.*, 2018, **6**, 15494-15502.
- 6 Y. R. Wang, Q. Huang, C. T. He, Y. F. Chen, J. Liu, F. C. Shen, and Y. Q. Lan, *Nat. Commun.*, 2018, **9**, 4466.
